# Supplementary material
Source: PubMed Central journal article supplement (PMC3241770)
Supplement: 1117835108_pnas.201117835SI.pdf [file 1117835108_pnas.201117835SI.pdf]

# Supporting Information

Krebs et al. 10.1073/pnas.1117835108

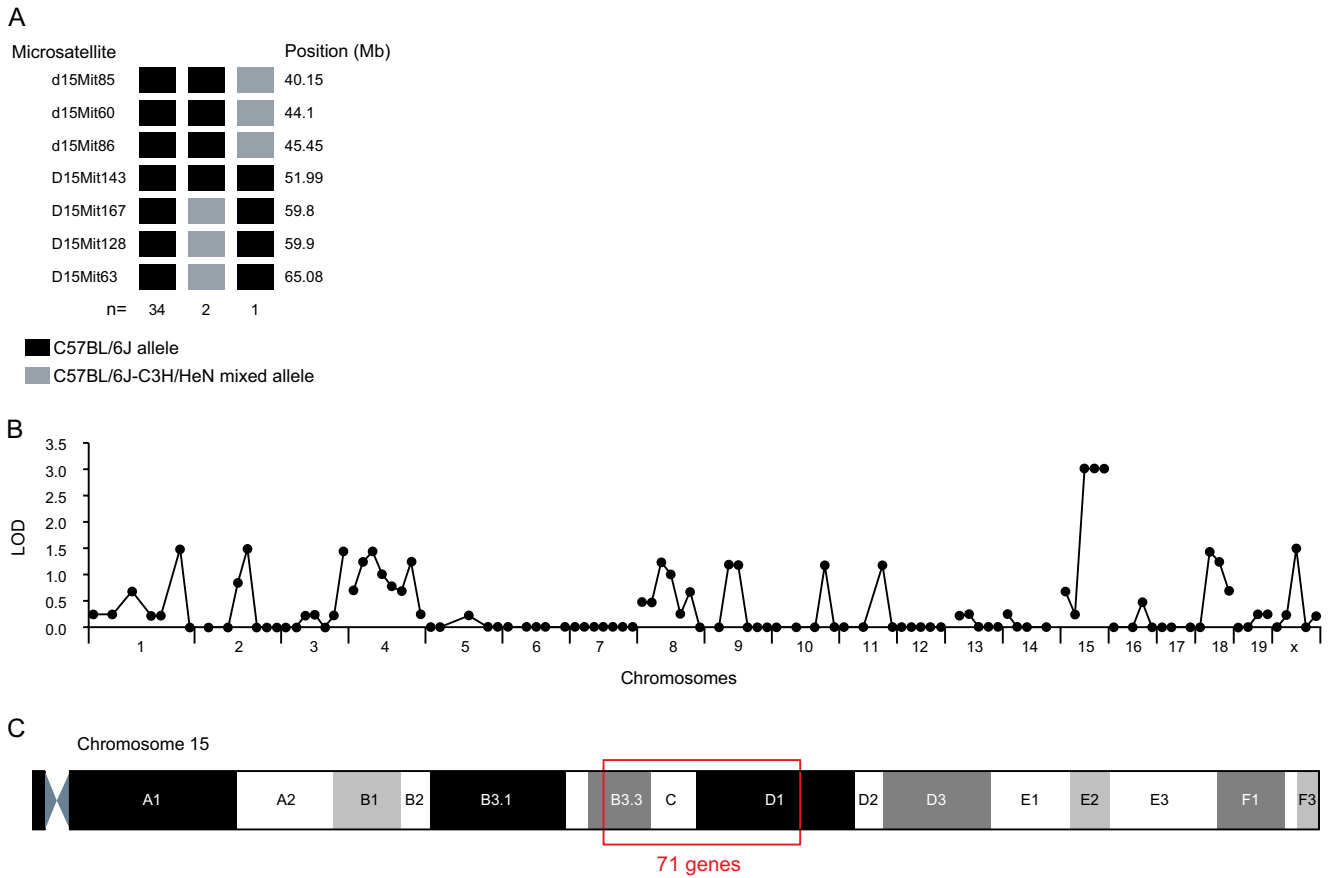

**Fig. S1.** Whole-genome linkage analysis of *zeitgeist*. (A) Meiotic mapping of the *Med30<sup>z9</sup>* phenotype on chromosome 15 using F2 backcross progeny of C57BL/6J<sup>z9/+</sup> × C3H/HeN F1 hybrids. Haplotypes of affected *Med30<sup>z9/z9</sup>* mice are shown. Black squares indicate C57BL/6J homozygosity, gray squares C57BL/6J-C3H/HeN heterozygosity. Number of mice used is indicated. Mb, megabases. (B) Ten meioses were used to confine *zeitgeist* to the distal region of chromosome 15 with a logarithm of odds (LOD) score of 3.0. (C) The critical region contains 71 annotated genes.

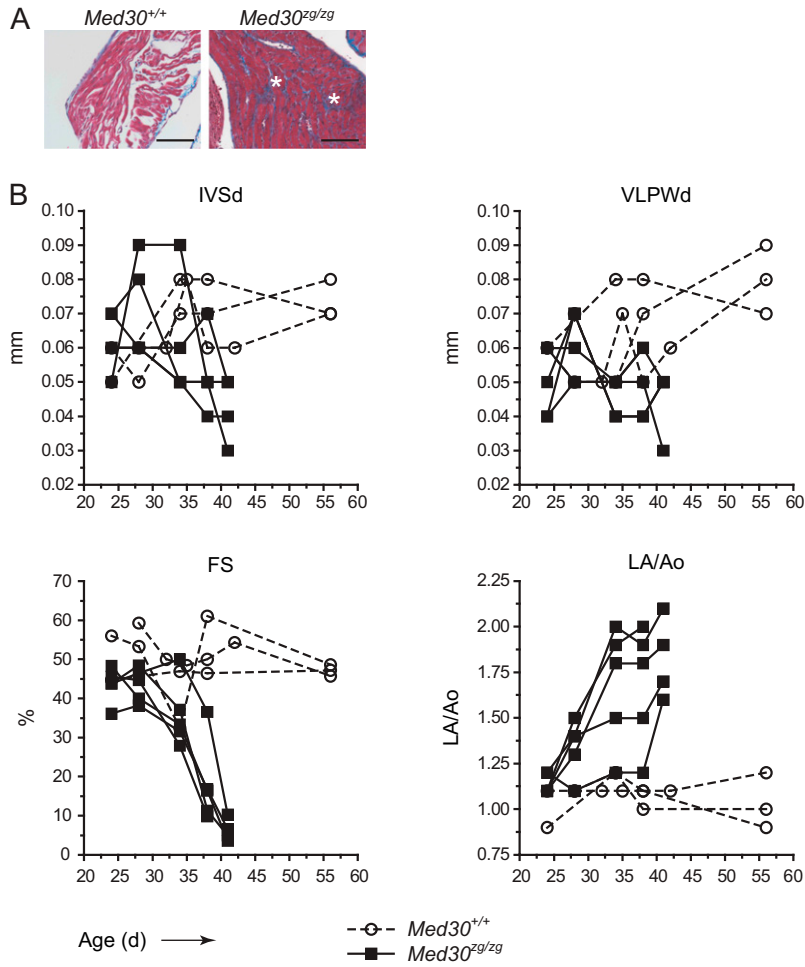

**Fig. 52.** Myocardial fibrosis and functional impairment of the heart in *zeitgeist* homozygotes. (A) Masson's trichrome staining of atrium. Asterisks show areas of prominent fibrosis. (Scale bars, 100  $\mu$ m.) (B) Time-course analysis of interventricular septal thickness at diastole (IVSd, Upper Left), left ventricular posterior wall dimensions (LVPWd, Upper Right), fractional shortening (FS, Lower Left), left atrium/aorta ratio (LA/Ao, Lower Right). *n* = 3 for wild type and 5 for mutant mice.

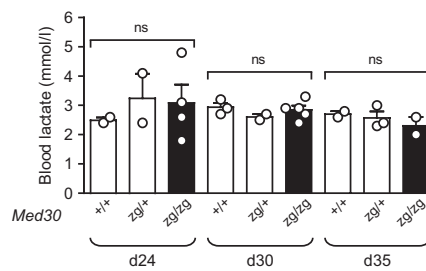

**Fig. 53.** Normal blood lactate concentration in *Med30<sup>zg/zg</sup>* mice. Analysis of blood lactate at days 24, 30, and 35 in *Med30<sup>zg/zg</sup>*, *Med30<sup>zg/+</sup>*, and *Med30<sup>+/+</sup>* mice. ns, nonsignificant. Values of quantitative results are expressed as mean  $\pm$  SEM and overlapped with results for single mice. Lactate concentration was measured using a Lactate Scout Analyzer device. For each time point, the statistical significance of differences among the three genotypes was calculated using a one-way ANOVA test.

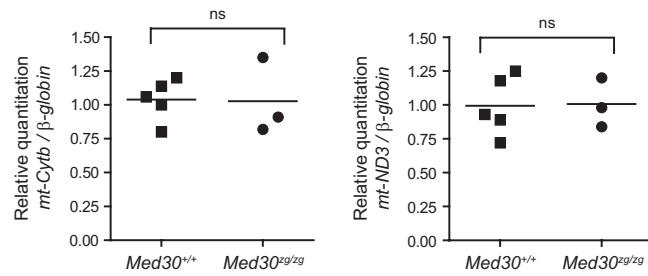

**Fig. 54.** Relative mitochondrial DNA copy numbers are similar in *Med30<sup>zg/zg</sup>* and wild-type hearts. Ratio of gene expression of either mitochondrial *mt-Cytb* or *mt-Nd3* over expression of nuclear  $\beta$ -globin is plotted. Each point represents an individual mouse.

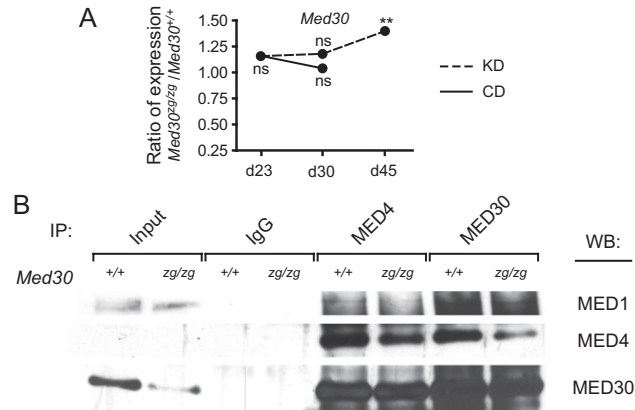

**Fig. 55.** (A) Relative expression of *Med30* at 23, 30 and 45 d of age as measured by quantitative PCR. Mice were fed either chow (CD; solid lines) or ketogenic (KD; dotted lines) diet beginning on day 23, when they were weaned. Gene expression in *Med30<sup>zg/zg</sup>* over that in *Med30<sup>+/+</sup>* whole hearts is represented. For each biological sample, quantitative PCR reactions were performed in duplicate, and expression was normalized to *Rpl32* expression. For each indicated time point and diet,  $P$  values were determined by comparing the relative expression of the indicated gene in *Med30<sup>zg/zg</sup>* vs. *Med30<sup>+/+</sup>* hearts using an unpaired Student's two-tailed  $t$  test. For *Med30<sup>zg/zg</sup>* hearts,  $n = 3$  for day 23 CD;  $n = 8$  for day 30 CD;  $n = 5$  for day 30 KD;  $n = 5$  for day 45 KD. For *Med30<sup>+/+</sup>* hearts,  $n = 2$  for day 23 CD;  $n = 3$  for day 30 CD;  $n = 5$  for day 30 KD;  $n = 4$  for day 45 KD. ns, nonsignificant. (B) *MED30<sup>zg/zg</sup>* does not cause any major perturbation of the Mediator complex integrity. Single-cell suspension was made from pooled thymi and spleens from littermate *Med30<sup>+/+</sup>* or *Med30<sup>zg/zg</sup>* mice. Nuclear extracts were isolated as previously described (1). Rabbit IgG, MED4- or MED30-specific immunoglobulins, respectively, were used for immunoprecipitation in binding buffer containing 100 mM NaCl and 0.15% Nonidet P-40, overnight at 4 °C. Immunoprecipitates were washed six times using the same buffer. After elution in Laemmli sample buffer, supernatants were separated by SDS/PAGE on a 4–12% gradient gel and analyzed by immunoblotting using MED1/TRAP220 antibody, anti-MED4, or anti-MED30 immune sera. Input represents 10% of the nuclear lysates used for immunoprecipitation reactions (20  $\mu$ g and 200  $\mu$ g of proteins, respectively). Samples shown were all processed in parallel.

1. Dignam JD, Lebovitz RM, Roeder RG (1983) Accurate transcription initiation by RNA polymerase II in a soluble extract from isolated mammalian nuclei. *Nucleic Acids Res* 11:1475–1489.

**Table S1. Noncomplementation between the *Med30<sup>zg</sup>* allele and a *Med30<sup>Δexon4</sup>* trap allele**

| <i>Med30<sup>+/Δexon4</sup></i> × <i>Med30<sup>+/zg</sup></i> Pups | Observed | Expected |
|--------------------------------------------------------------------|----------|----------|
| <i>Med30<sup>zg/Δexon4</sup></i>                                   | 0        | 12.5     |
| <i>Med30<sup>+/zg</sup></i>                                        | 16       | 12.5     |
| <i>Med30<sup>+/Δexon4</sup></i>                                    | 17       | 12.5     |
| <i>Med30<sup>+/+</sup></i>                                         | 17       | 12.5     |
| Total                                                              | 50       |          |

Distribution of the genotypes in progeny from intercrosses of *Med30<sup>zg/+</sup>* and *Med30<sup>Δexon4/+</sup>* mice. Significance was determined by Freeman-Halton extension of the Fisher's exact probability test ( $P = 0.0032$ ).

**Table S2. Distribution of genotypes in progeny from *Med30*<sup>z<sup>g</sup>/+</sup> intercrosses**

| Progeny                                             | Observed | Expected |
|-----------------------------------------------------|----------|----------|
| <b>Pups</b>                                         |          |          |
| <i>Med30</i> <sup>z<sup>g</sup>/z<sup>g</sup></sup> | 53       | 91.5     |
| <i>Med30</i> <sup>+/z<sup>g</sup></sup>             | 202      | 183      |
| <i>Med30</i> <sup>+/+</sup>                         | 111      | 91.5     |
| Total                                               | 366      |          |
| <b>E15.5 embryos</b>                                |          |          |
| <i>Med30</i> <sup>z<sup>g</sup>/z<sup>g</sup></sup> | 6        | 6.75     |
| <i>Med30</i> <sup>+/z<sup>g</sup></sup>             | 12       | 13.5     |
| <i>Med30</i> <sup>+/+</sup>                         | 9        | 6.75     |
| Total                                               | 27       |          |

Pups were genotyped at 2 wk of age ( $P < 0.0001$ , Chi-Square test). Litters were carefully counted on the day of birth and no postnatal deaths were observed before weaning. E15.5 embryos:  $P = 0.799$ , Freeman-Halton extension of the Fisher's exact probability test. Comparison of the observed distributions of genotypes among pups versus embryos,  $P = 0.4152$  (Chi-Square test).

**Table S3. Hemodynamic parameters of 35-d-old *Med30*<sup>z<sup>g</sup>/z<sup>g</sup> mice and control littermates</sup>**

| Hemodynamic parameter | <i>Med30</i> <sup>+/+</sup><br>( $n = 3$ ) | <i>Med30</i> <sup>z<sup>g</sup>/z<sup>g</sup><br/>(<math>n = 4</math>)</sup> | <i>P</i> value |
|-----------------------|--------------------------------------------|------------------------------------------------------------------------------|----------------|
| LVIDd (mm)            | 3.57 ± 0.21                                | 4.78 ± 0.26                                                                  | 0.0013         |
| IVSd (mm)             | 0.6 ± 0.02                                 | 0.5 ± 0.08                                                                   | 0.0624         |
| LVPWd (mm)            | 0.77 ± 0.06                                | 0.5 ± 0.17                                                                   | 0.0968         |
| LA/Ao                 | 1.5 ± 0.4                                  | 2.9 ± 0.8                                                                    | 0.0394         |
| FS (%)                | 45.7 ± 4.0                                 | 13.9 ± 5.9                                                                   | 0.0004         |
| EF of LV (%)          | 84.6 ± 5.9                                 | 27.2 ± 6.0                                                                   | <0.0001        |

EF, ejection fraction; FS, fractional shortening; IVSd, interventricular septum, diastolic phase; LA/Ao, left atrial/aorta ratio; LV, left ventricle; LVIDd, LV chamber diameter, diastolic phase; LVPWd, LV posterior wall, diastolic phase.

**Table S4. Blood chemistry values for three *Med30*<sup>z<sup>g</sup>/z<sup>g</sup> mutants with dilated cardiomyopathy</sup>**

|                   | Units  | <i>Med30</i> <sup>z<sup>g</sup>/z<sup>g</sup> #1</sup> | <i>Med30</i> <sup>z<sup>g</sup>/z<sup>g</sup> #2</sup> | <i>Med30</i> <sup>z<sup>g</sup>/z<sup>g</sup> #3</sup> | Standard range |      |
|-------------------|--------|--------------------------------------------------------|--------------------------------------------------------|--------------------------------------------------------|----------------|------|
|                   |        |                                                        |                                                        |                                                        | mean           | SD   |
| Albumin           | g/dL   | 1.1                                                    | <1.0                                                   | <1.0                                                   | 1.4            | 0.2  |
| Alkaline phos     | IU/L   | 124                                                    | 262                                                    | 214                                                    | 101.5          | 32.2 |
| ALT (SGPT)        | IU/L   | 14                                                     | 78                                                     | 104                                                    | 38.7           | 25.9 |
| AST (SGOT)        | IU/L   | 72                                                     | 54                                                     | 82                                                     | 72.7           | 36.3 |
| Bicarbonate       | mmol/L | 15                                                     | 15                                                     | 19                                                     | 15.9           | 3.2  |
| Bilirubin, Direct | mg/dL  | 0.2                                                    | 0.1                                                    | 0.2                                                    | 0.1            | 0.1  |
| Bilirubin, Total  | mg/dL  | 0.1                                                    | 0.3                                                    | 0.3                                                    | 0.4            | 0.2  |
| BUN               | mg/dL  | 74                                                     | 38                                                     | 58                                                     | 21.4           | 4.4  |
| Calcium           | mg/dL  | 8.0                                                    | 9.5                                                    | 8.8                                                    | 9.0            | 0.4  |
| Chloride          | mmol/L | 113                                                    | 114                                                    | 105                                                    | 107.5          | 4.2  |
| Creatinine        | mg/dL  | <0.2                                                   | 0.2                                                    | <0.2                                                   | 0.2            | 0.2  |
| Glucose           | mg/dL  | 130                                                    | 266                                                    | 280                                                    | 196.7          | 91.2 |
| Phosphorous       | mg/dL  | 8.8                                                    | 10.0                                                   | 10.1                                                   | 8.0            | 1.6  |
| Potassium         | mmol/L | 6.8                                                    | 7.0                                                    | 5.7                                                    | 5.0            | 1.1  |
| Sodium            | mmol/L | 149                                                    | 152                                                    | 140                                                    | 150.5          | 3.9  |
| Total protein     | gm/dL  | 3.1                                                    | 3.1                                                    | 3.0                                                    | 4.2            | 0.3  |

ALT, alanine aminotransferase; AST, aspartate aminotransferase; BUN, blood urea nitrogen. Standard range represents the mean values and SD measured in ~400 control C57BL/6 mice.
